# Supplementary material for: Effect of Dapagliflozin on Outpatient Worsening of Patients With Heart Failure and Reduced Ejection Fraction: A Prespecified Analysis of DAPA-HF
Source: PubMed Central journal article supplement (PMC7580857; doi:10.1161/circulationaha.120.047480), 2020-09-04
Supplement: cir-142-1623-s001.pdf [file cir-142-1623-s001.pdf]

**Effect of dapagliflozin on outpatient worsening of patients with heart failure and reduced ejection fraction: A prespecified analysis of DAPA-HF.**

**SUPPLEMENTAL MATERIAL**

**Supplemental Table I:** Risk of death from any cause after a hospitalization for heart failure, urgent heart failure visit, and intensification of therapy for heart failure using a cox model with event type as the first event experienced.

|                                                                                                 | No Event | Hospitalization for HF | Urgent HF Visit   | Intensification of HF Therapy |
|-------------------------------------------------------------------------------------------------|----------|------------------------|-------------------|-------------------------------|
| <b>Each event as the first event experienced in a time-updated model, hazard ratio (95% CI)</b> |          |                        |                   |                               |
| Adjusted for randomized treatment and prior HF hospitalization                                  | 1        | 8.36 (6.89-10.15)      | 7.04 (3.32-14.90) | 3.12 (2.38-4.09)              |
| Adjusted for randomized treatment , prior HF hospitalization and baseline covariates*           | 1        | 6.21 (5.07-7.62)       | 3.00 (1.39-6.48)  | 2.67 (2.03-3.52)              |

All models stratified by diabetes status.

\*Adjusted for randomized treatment, age, sex, region, race, NYHA functional classification, left ventricular ejection fraction, body mass index, pulse, systolic blood pressure, serum creatinine, log NT-proBNP, history of previous HF hospitalization, atrial fibrillation, stroke, myocardial infarction, hypertension , ischemic etiology and use of implantable cardioverter defibrillator and/or cardiac resynchronization therapy.

**Supplemental Table II:** Risk of death from any cause after a hospitalization for heart failure, urgent heart failure visit, and intensification of therapy for heart failure using a cox model with event type as the first event experienced – sensitivity analysis limiting the definition of outpatient HF worsening events to include only those in which the dose of diuretics was increased and sustained for at least four weeks.

|                                                                                                 | No Event | Hospitalization for HF | Urgent HF Visit   | Intensification of HF Therapy (diuretics only) |
|-------------------------------------------------------------------------------------------------|----------|------------------------|-------------------|------------------------------------------------|
| <b>Each event as the first event experienced in a time-updated model, hazard ratio (95% CI)</b> |          |                        |                   |                                                |
| Unadjusted                                                                                      | 1        | 8.53 (7.06-10.30)      | 6.50 (3.07-13.75) | 3.38 (2.54-4.49)                               |
| Adjusted for randomized treatment and prior HF hospitalization                                  | 1        | 8.26 (6.81-10.00)      | 6.30 (2.97-13.34) | 3.37 (2.53-4.48)                               |
| Adjusted for randomized treatment , prior HF hospitalization and baseline covariates*           | 1        | 6.14 (5.01-7.51)       | 2.85 (1.32-6.14)  | 2.82 (2.11-3.77)                               |

All adjusted models stratified by diabetes status.

\*Adjusted for randomized treatment, age, sex, region, race, NYHA functional classification, left ventricular ejection fraction, body mass index, pulse, systolic blood pressure, serum creatinine, log NT-proBNP, history of previous HF hospitalization, atrial fibrillation, stroke, myocardial infarction, hypertension , ischemic etiology and use of implantable cardioverter defibrillator and/or cardiac resynchronization therapy.

**Supplemental Table III:** Risk of death from any cause after a hospitalization for heart failure, urgent heart failure visit, and intensification of therapy for heart failure using a cox model with event type as the first event experienced – sensitivity analysis using a 7-day period between events to identify independent events

|                                                                                                 | No Event | Hospitalization for HF | Urgent HF Visit   | Intensification of HF Therapy (diuretics only) |
|-------------------------------------------------------------------------------------------------|----------|------------------------|-------------------|------------------------------------------------|
| <b>Each event as the first event experienced in a time-updated model, hazard ratio (95% CI)</b> |          |                        |                   |                                                |
| Unadjusted                                                                                      | 1        | 8.32 (6.86-10.09)      | 7.07 (3.34-14.96) | 3.52 (2.72-4.54)                               |
| Adjusted for randomized treatment and prior HF hospitalization                                  | 1        | 8.03 (6.60-9.78)       | 6.84 (3.23-14.49) | 3.50 (2.70-4.52)                               |
| Adjusted for randomized treatment , prior HF hospitalization and baseline covariates*           | 1        | 5.96 (4.85-7.33)       | 3.04 (1.41-6.59)  | 2.96 (2.28-3.84)                               |

All adjusted models stratified by diabetes status.

\*Adjusted for randomized treatment, age, sex, region, race, NYHA functional classification, left ventricular ejection fraction, body mass index, pulse, systolic blood pressure, serum creatinine, log NT-proBNP, history of previous HF hospitalization, atrial fibrillation, stroke, myocardial infarction, hypertension , ischemic etiology and use of implantable cardioverter defibrillator and/or cardiac resynchronization therapy.
